# Supplementary material for: Public Attitudes to Digital Health Research Repositories: Cross-sectional International Survey
Source: PubMed Central journal article supplement (PMC8590194; doi:10.2196/31294), 2021-10-29
Supplement: jmir_v23i10e31294_app1.pdf [file jmir_v23i10e31294_app1.pdf]

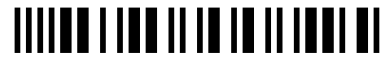

**Please answer our survey and express your opinion about data sharing for health research. We want to hear from you to understand your boundaries and preferences.**

**Questions should take 10 minutes only. We hope you can help!**

## **Section A: Informed Consent**

We are a group of researchers from the Copenhagen Center for Health Technology (CACHET). Before we start collecting data, we need to be sure you read, understand and agree with the following:

What is the purpose of this survey? To understand people's opinions about health research for a university/academic project.

Which data will be collected? Voluntary demographics (e.g., age, gender), opinions about research and preferences about data sharing.

Will this data be linked to me personally? No, this survey is anonymous: no personally identifiable data is collected (e.g., name, e-mail, IP address, geo-location).

How will data be processed? Statistical analysis will be conducted by the principal researcher for scientific reports, which will only contain aggregate results.

How will data be stored? The anonymous answers will be stored at a secured repository hosted at the university until the end of the project (October 2021).

How can I delete my data? You can click on [Exit and clear survey](#) on the top right of the page or contact us with a unique ID code which you will create.

How to contact us? - Responsible researcher: PhD candidate, Giovanna Vilaza: [gnyi@dtu.dk](mailto:gnyi@dtu.dk) - Director of the CACHET Research Centre: Prof Dr Jakob Bardram: [jakba@dtu.dk](mailto:jakba@dtu.dk) - Data protection officer at DTU, Ane Sandager: [anesa@dtu.dk](mailto:anesa@dtu.dk)

**A1. Do you confirm that:**  
**- you are more than 18 years old;**  
**- you have read and understood the information above; - and you**  
**voluntarily agree to participate in this survey?**

Yes

No

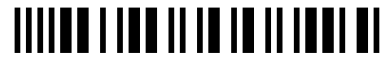

## Section B: Demographics

**B1. What is your age group?**

- 18-27
- 28-37
- 38-47
- 48-57
- Above 57
- Prefer not to say

**B2. What is your gender?**

- Female
- Male
- Non-binary
- Prefer not to say
- Prefer to self-describe

Prefer to self-describe

**B3. What is your education level?**

- Less than High School/Secondary School
- Completed High School/Secondary School
- Completed a Bachelor's degree/Undergraduate
- Completed a Master's degree/Graduate
- Completed a PhD degree or above
- Prefer not to say
- Other

Other

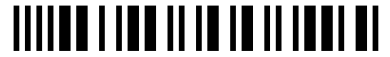

**B4. Which of these digital devices do you have and use?**

Computer (desktop, laptop)

Tablet (iPad)

Smartphone (Samsung, iPhone)

Wrist wearables (Apple Watch, Garmin, Fitbit, Polar)

Smart home devices (Alexa, Google Home, Hive, Philips Hue)

Other

Other

**B5. In which country do you currently live?**

Afghanistan

Albania

Algeria

Andorra

Angola

Antigua and Barbuda

Argentina

Armenia

Australia

Austria

Azerbaijan

Bahamas

Bahrain

Bangladesh

Barbados

Belarus

Belgium

Belize

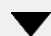

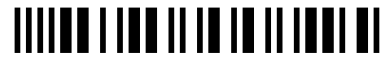

- Benin
- Bhutan
- Bolivia (Plurinational State of)
- Bosnia and Herzegovina
- Botswana
- Brazil
- Brunei Darussalam
- Bulgaria
- Burkina Faso
- Burundi
- Cabo Verde
- Cambodia
- Cameroon
- Canada
- Central African Republic
- Chad
- Chile
- China
- Colombia
- Comoros
- Congo
- Cook Islands
- Costa Rica
- Côte d'Ivoire
- Croatia
- Cuba
- Cyprus
- Czech Republic
- Democratic People's Republic of Korea

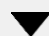



- Congo
- Denmark
- Djibouti
- Dominica
- Dominican Republic
- Ecuador
- Egypt
- El Salvador
- Equatorial Guinea
- Eritrea
- Estonia
- Ethiopia
- Fiji
- Finland
- France
- Gabon
- Gambia
- Georgia
- Germany
- Ghana
- Greece
- Grenada
- Guatemala
- Guinea
- Guinea-Bissau
- Guyana
- Haiti
- Honduras
- Hungary





- Iceland
- India
- Indonesia
- Iran (Islamic Republic of)
- Iraq
- Ireland
- Israel
- Italy
- Jamaica
- Japan
- Jordan
- Kazakhstan
- Kenya
- Kiribati
- Kuwait
- Kyrgyzstan
- Lao People's Democratic Republic
- Latvia
- Lebanon
- Lesotho
- Liberia
- Libya
- Lithuania
- Luxembourg
- Madagascar
- Malawi
- Malaysia
- Maldives
- Mali





- Malta
- Marshall Islands
- Mauritania
- Mauritius
- Mexico
- Micronesia (Federated States of)
- Monaco
- Mongolia
- Montenegro
- Morocco
- Mozambique
- Myanmar
- Namibia
- Nauru
- Nepal
- Netherlands
- New Zealand
- Nicaragua
- Niger
- Nigeria
- Niue
- Norway
- Oman
- Pakistan
- Palau
- Panama
- Papua New Guinea
- Paraguay
- Peru





- Philippines
- Poland
- Portugal
- Puerto Rico
- Qatar
- Republic of Korea
- Republic of Moldova
- Romania
- Russian Federation
- Rwanda
- Saint Kitts and Nevis
- Saint Lucia
- Saint Vincent and the Grenadines
- Samoa
- San Marino
- Sao Tome and Principe
- Saudi Arabia
- Senegal
- Serbia
- Seychelles
- Sierra Leone
- Singapore
- Slovakia
- Slovenia
- Solomon Islands
- Somalia
- South Africa
- South Sudan
- Spain





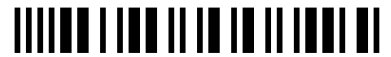

Sri Lanka

Sudan

Suriname

Swaziland

Sweden

Switzerland

Syrian Arab Republic

Tajikistan

Thailand

The former Yugoslav Republic of Macedonia

Timor-Leste

Togo

Tokelau

Tonga

Trinidad and Tobago

Tunisia

Turkey

Turkmenistan

Tuvalu

Uganda

Ukraine

United Arab Emirates

the United Kingdom of Great Britain and Northern Ireland

United Republic of Tanzania

United States of America

Uruguay

Uzbekistan

Vanuatu

Venezuela (Bolivarian Republic of)

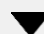

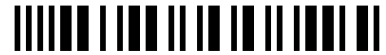

Viet Nam

Yemen

Zambia

Zimbabwe

Other

Other

## Section C: Health

**C1. In general, would you say your health is:**

Excellent

Very good

Good

Fair

Poor

Prefer not to say

**C2. How interested are you in health-related topics?**

Extremely interested

Very interested

Moderately interested

Slightly interested

Not interested

Prefer not to say

**C3. Have you ever participated in a research study about health?**

Yes

No

Prefer not to say



## Section D: Research data repository

The following definition is very important for the next questions. Please read it carefully:

A research data repository is an online database containing data collected in previous studies. De-identified or anonymous data is stored to be re-used in the future by multiple researchers.

### D1. Do you know any example of a research data repository?

Yes

No

Not sure

Prefer not to say

### D2. Your current opinion about this idea of data repositories for health research is:

Positive

Negative

Indifferent

Prefer not to say

## Section E: Sharing your data with a repository (I)

How comfortable do you feel about having the following data stored in a research repository?

Please consider that any information shared is de-identified or anonymised before being analysed by researchers.

### E1. Health questionnaires (online or in-person):

|                               | Very uncomfortable       | Uncomfortable            | Neither                  | Comfortable              | Very comfortable         |
|-------------------------------|--------------------------|--------------------------|--------------------------|--------------------------|--------------------------|
| Clinical diagnosis (physical) | <input type="checkbox"/> | <input type="checkbox"/> | <input type="checkbox"/> | <input type="checkbox"/> | <input type="checkbox"/> |
| Clinical diagnosis (mental)   | <input type="checkbox"/> | <input type="checkbox"/> | <input type="checkbox"/> | <input type="checkbox"/> | <input type="checkbox"/> |
| Family health status          | <input type="checkbox"/> | <input type="checkbox"/> | <input type="checkbox"/> | <input type="checkbox"/> | <input type="checkbox"/> |
| DNA samples                   | <input type="checkbox"/> | <input type="checkbox"/> | <input type="checkbox"/> | <input type="checkbox"/> | <input type="checkbox"/> |
| Food consumption              | <input type="checkbox"/> | <input type="checkbox"/> | <input type="checkbox"/> | <input type="checkbox"/> | <input type="checkbox"/> |
| Alcohol consumption           | <input type="checkbox"/> | <input type="checkbox"/> | <input type="checkbox"/> | <input type="checkbox"/> | <input type="checkbox"/> |



|               | Very uncom<br>fortable   | Uncomfort<br>able        | Neither                  | Comfortabl<br>e          | Very<br>comfortabl<br>e  |
|---------------|--------------------------|--------------------------|--------------------------|--------------------------|--------------------------|
| Sleep         | <input type="checkbox"/> | <input type="checkbox"/> | <input type="checkbox"/> | <input type="checkbox"/> | <input type="checkbox"/> |
| Blood samples | <input type="checkbox"/> | <input type="checkbox"/> | <input type="checkbox"/> | <input type="checkbox"/> | <input type="checkbox"/> |

## Section F: Sharing your data with a repository (II)

How comfortable do you feel about having the following data stored in a research repository?

Please consider that any information shared is de-identified or anonymised before being analysed by researchers.

### F1. Passive monitoring through a phone or wearable device:

|                                               | Very unco<br>mfortable   | Uncomfort<br>able        | Neither                  | Comfortabl<br>e          | Very<br>comfortabl<br>e  |
|-----------------------------------------------|--------------------------|--------------------------|--------------------------|--------------------------|--------------------------|
| Screen time                                   | <input type="checkbox"/> | <input type="checkbox"/> | <input type="checkbox"/> | <input type="checkbox"/> | <input type="checkbox"/> |
| Apps used                                     | <input type="checkbox"/> | <input type="checkbox"/> | <input type="checkbox"/> | <input type="checkbox"/> | <input type="checkbox"/> |
| Frequency of social communication(calls/text) | <input type="checkbox"/> | <input type="checkbox"/> | <input type="checkbox"/> | <input type="checkbox"/> | <input type="checkbox"/> |
| Content of social communication(calls/text)   | <input type="checkbox"/> | <input type="checkbox"/> | <input type="checkbox"/> | <input type="checkbox"/> | <input type="checkbox"/> |
| Distances travelled perday                    | <input type="checkbox"/> | <input type="checkbox"/> | <input type="checkbox"/> | <input type="checkbox"/> | <input type="checkbox"/> |
| Places visited everyday                       | <input type="checkbox"/> | <input type="checkbox"/> | <input type="checkbox"/> | <input type="checkbox"/> | <input type="checkbox"/> |
| Physical activity levels (heart rate)         | <input type="checkbox"/> | <input type="checkbox"/> | <input type="checkbox"/> | <input type="checkbox"/> | <input type="checkbox"/> |
| Stress/emotional levels (heartrate)           | <input type="checkbox"/> | <input type="checkbox"/> | <input type="checkbox"/> | <input type="checkbox"/> | <input type="checkbox"/> |

## Section G: Motivations

### G1. Still in the context of research data repositories, how motivated do you feel by the following reasons to contribute to one of them?

|                                | Not<br>motivated         | Slightly<br>motivated    | Moderately<br>motivated  | Very<br>motivated        | Extremely<br>motivated   |
|--------------------------------|--------------------------|--------------------------|--------------------------|--------------------------|--------------------------|
| Helping future patients        | <input type="checkbox"/> | <input type="checkbox"/> | <input type="checkbox"/> | <input type="checkbox"/> | <input type="checkbox"/> |
| Helping the researchers        | <input type="checkbox"/> | <input type="checkbox"/> | <input type="checkbox"/> | <input type="checkbox"/> | <input type="checkbox"/> |
| Receiving results aboutmyself  | <input type="checkbox"/> | <input type="checkbox"/> | <input type="checkbox"/> | <input type="checkbox"/> | <input type="checkbox"/> |
| Getting financial compensation | <input type="checkbox"/> | <input type="checkbox"/> | <input type="checkbox"/> | <input type="checkbox"/> | <input type="checkbox"/> |

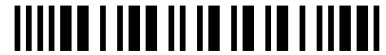

Not motivated      Slightly motivated      Moderately motivated      Very motivated      Extremely motivated

|                                        |                          |                          |                          |                          |                          |
|----------------------------------------|--------------------------|--------------------------|--------------------------|--------------------------|--------------------------|
| Proposing questions to be investigated | <input type="checkbox"/> | <input type="checkbox"/> | <input type="checkbox"/> | <input type="checkbox"/> | <input type="checkbox"/> |
| Receiving the results of the research  | <input type="checkbox"/> | <input type="checkbox"/> | <input type="checkbox"/> | <input type="checkbox"/> | <input type="checkbox"/> |

## Section H: Access options

### H1. How desirable/undesirable do you think the following access options for a health research data repository are?

Very undesirable      Undesirable      Neither      Desirable      Very desirable

|                                                              |                          |                          |                          |                          |                          |
|--------------------------------------------------------------|--------------------------|--------------------------|--------------------------|--------------------------|--------------------------|
| To receive information about the projects using my data      | <input type="checkbox"/> | <input type="checkbox"/> | <input type="checkbox"/> | <input type="checkbox"/> | <input type="checkbox"/> |
| To not be contacted after I share my data                    | <input type="checkbox"/> | <input type="checkbox"/> | <input type="checkbox"/> | <input type="checkbox"/> | <input type="checkbox"/> |
| To decide who can have access to which parts my data         | <input type="checkbox"/> | <input type="checkbox"/> | <input type="checkbox"/> | <input type="checkbox"/> | <input type="checkbox"/> |
| To have the repository managers deciding who can get access  | <input type="checkbox"/> | <input type="checkbox"/> | <input type="checkbox"/> | <input type="checkbox"/> | <input type="checkbox"/> |
| That public or academic institutions are eligible for access | <input type="checkbox"/> | <input type="checkbox"/> | <input type="checkbox"/> | <input type="checkbox"/> | <input type="checkbox"/> |
| That private labs and companies are eligible for access      | <input type="checkbox"/> | <input type="checkbox"/> | <input type="checkbox"/> | <input type="checkbox"/> | <input type="checkbox"/> |

## Section I: Concerns

### I1. How concerned do you feel about the following risks of having your health data stored in a research repository?

Not concerned      Slightly concerned      Moderately concerned      Very concerned      Extremely concerned

|                                                                      |                          |                          |                          |                          |                          |
|----------------------------------------------------------------------|--------------------------|--------------------------|--------------------------|--------------------------|--------------------------|
| Being vulnerable to cyber-attacks and blackmailing                   | <input type="checkbox"/> | <input type="checkbox"/> | <input type="checkbox"/> | <input type="checkbox"/> | <input type="checkbox"/> |
| Having my data used for projects that I think are unethical          | <input type="checkbox"/> | <input type="checkbox"/> | <input type="checkbox"/> | <input type="checkbox"/> | <input type="checkbox"/> |
| Having my data used for profit without me knowing about it           | <input type="checkbox"/> | <input type="checkbox"/> | <input type="checkbox"/> | <input type="checkbox"/> | <input type="checkbox"/> |
| Being socially discriminated because of certain information I shared | <input type="checkbox"/> | <input type="checkbox"/> | <input type="checkbox"/> | <input type="checkbox"/> | <input type="checkbox"/> |
| Agreeing with terms and conditions that I do not fully understand    | <input type="checkbox"/> | <input type="checkbox"/> | <input type="checkbox"/> | <input type="checkbox"/> | <input type="checkbox"/> |
| Being asked to provide more data in the future                       | <input type="checkbox"/> | <input type="checkbox"/> | <input type="checkbox"/> | <input type="checkbox"/> | <input type="checkbox"/> |

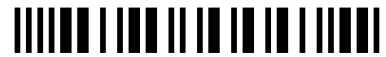

## Section J: Feedback

**J1. Do you allow your anonymous answers for this survey to be stored in an open repository and be accessed by other researchers?**

Yes

No

**J2. This survey is anonymous, which makes it impossible for us to know which answer is yours. If later on you want to access your answers or have them deleted, please create an ID code for you now (e.g., hello123), and send it to us by e-mail:**

*Contact: [gnyi@dtu.dk](mailto:gnyi@dtu.dk) or [jakba@dtu.dk](mailto:jakba@dtu.dk)*

**J3. Please, let us know if you have any comment or feedback about this survey:**

**Thank you so much for your time and answer! We really appreciate that.**

**Do you want to receive the final survey results? Please contact: Giovanna Vilaza, PhD candidate, at [gnyi@dtu.dk](mailto:gnyi@dtu.dk) or Prof. Jakob Bardram, at [jakba@dtu.dk](mailto:jakba@dtu.dk)**
