# Supplementary material for: Public Attitudes to Digital Health Research Repositories: Cross-sectional International Survey
Source: PubMed Central journal article supplement (PMC8590194; doi:10.2196/31294), 2021-10-29
Supplement: jmir_v23i10e31294_app2.pdf [file jmir_v23i10e31294_app2.pdf]

| Motivation sources                            | All participants, n (%) | Participants in Brazil, n (%) | Participants in Denmark, n (%) |
|-----------------------------------------------|-------------------------|-------------------------------|--------------------------------|
| <b>Helping future patients</b>                |                         |                               |                                |
| Not or slightly motivated                     | 58 (3.62)               | 25 (2.45)                     | 33 (5.66)                      |
| Moderately to extremely motivated             | 1542 (96.75)            | 992 (97.5)                    | 550 (94.3)                     |
| Prefer not to say                             | 0 (0)                   | 0 (0)                         | 0 (0)                          |
| <b>Helping the researchers</b>                |                         |                               |                                |
| Not or slightly motivated                     | 76 (4.75)               | 27 (2.65)                     | 59 (10.12)                     |
| Moderately to extremely motivated             | 1524 (95.25)            | 990 (97.34)                   | 534 (91.59)                    |
| Prefer not to say                             | 0 (0)                   | 0 (0)                         | 0 (0)                          |
| <b>Receiving results about myself</b>         |                         |                               |                                |
| Not or slightly motivated                     | 139 (8.68)              | 34 (0.33)                     | 105 (18.01)                    |
| Moderately to extremely motivated             | 1459 (91.18)            | 982 (96.55)                   | 477 (81.81)                    |
| Prefer not to say                             | 2 (0.125)               | 1 (0.09)                      | 1 (0.17)                       |
| <b>Receiving the research results</b>         |                         |                               |                                |
| Not or slightly motivated                     | 185 (11.56)             | 62 (6.09)                     | 123 (21.09)                    |
| Moderately to extremely motivated             | 1413 (88.31)            | 955 (93.9)                    | 458 (78.55)                    |
| Prefer not to say                             | 2 (0.125)               | 0 (0)                         | 2 (0.34)                       |
| <b>Proposing questions to be investigated</b> |                         |                               |                                |
| Not or slightly motivated                     | 336 (21.00)             | 102 (10.02)                   | 234 (40.13)                    |
| Moderately to extremely motivated             | 1260 (88.31)            | 915 (89.97)                   | 345 (59.17)                    |
| Prefer not to say                             | 4 (0.25)                | 0 (0.00)                      | 4 (0.68)                       |
| <b>Getting financial compensation</b>         |                         |                               |                                |
| Not or slightly motivated                     | 732 (45.75)             | 457 (44.93)                   | 275 (47.16)                    |

| Motivation sources                | All participants, n (%) | Participants in Brazil, n (%) | Participants in Denmark, n (%) |
|-----------------------------------|-------------------------|-------------------------------|--------------------------------|
| Moderately to extremely motivated | 867 (54.18)             | 560 (55.06)                   | 307 (52.65)                    |
| Prefer not to say                 | 1 (0.06)                | 0 (0)                         | 1 (0.17)                       |
