# Supplementary material for: Public Attitudes to Digital Health Research Repositories: Cross-sectional International Survey
Source: PubMed Central journal article supplement (PMC8590194; doi:10.2196/31294), 2021-10-29
Supplement: jmir_v23i10e31294_app3.pdf [file jmir_v23i10e31294_app3.pdf]

| Reasons for concern                                     | All participants, n (%) | Participants in Brazil, n (%) | Participants in Denmark, n (%) |
|---------------------------------------------------------|-------------------------|-------------------------------|--------------------------------|
| <b>Data is used for research with unethical goals</b>   |                         |                               |                                |
| Not or slightly concerned                               | 180 (11.25)             | 51 (5.01)                     | 129 (22.12)                    |
| Moderately to extremely concerned                       | 1415 (88.43)            | 966 (94.98)                   | 449 (77.01)                    |
| Prefer not to say                                       | 5 (0.31)                | 0 (0)                         | 5 (0.85)                       |
| <b>Data is used for profit without explicit consent</b> |                         |                               |                                |
| Not or slightly concerned                               | 245 (15.31)             | 91 (8.94)                     | 154 (26.41)                    |
| Moderately to extremely concerned                       | 1351 (84.43)            | 926 (91.05)                   | 425 (72.89)                    |
| Prefer not to say                                       | 4 (0.25)                | 0 (0)                         | 4 (0.68)                       |
| <b>Suffering from cyber-attacks and blackmail</b>       |                         |                               |                                |
| Not or slightly concerned                               | 307 (19.18)             | 115 (11.3)                    | 192 (32.93)                    |
| Moderately to extremely concerned                       | 1288 (80.50)            | 901 (88.59)                   | 387 (66.38)                    |
| Prefer not to say                                       | 5 (0.31)                | 1 (0.09)                      | 4 (0.68)                       |
| <b>Agreeing with terms without fully understanding</b>  |                         |                               |                                |
| Not or slightly concerned                               | 322 (20.12)             | 154 (15.14)                   | 168 (28.81)                    |
| Moderately to extremely concerned                       | 1273 (79.56)            | 863 (84.85)                   | 410 (70.32)                    |
| Prefer not to say                                       | 5 (0.31)                | 0 (0)                         | 5 (0.85)                       |
| <b>Being socially discriminated because of the data</b> |                         |                               |                                |
| Not or slightly concerned                               | 561 (35.06)             | 294 (28.9)                    | 267 (45.79)                    |
| Moderately to extremely concerned                       | 1035 (64.68)            | 723 (71.09)                   | 312 (53.51)                    |
| Prefer not to say                                       | 4 (0.25)                | 0 (0)                         | 4 (0.68)                       |
| <b>Being asked to provide more data in the future</b>   |                         |                               |                                |

| Reasons for concern |                                      | All participants,<br>n (%) | Participants in<br>Brazil, n (%) | Participants in<br>Denmark, n (%) |
|---------------------|--------------------------------------|----------------------------|----------------------------------|-----------------------------------|
|                     | Not or slightly concerned            | 662 (41.37)                | 316 (31.07)                      | 346 (59.34)                       |
|                     | Moderately to extremely<br>concerned | 933 (58.31)                | 700 (68.82)                      | 233 (39.96)                       |
|                     | Prefer not to say                    | 5 (0.31)                   | 1 (0.09)                         | 4 (0.68)                          |
