# Supplementary material for: Public Attitudes to Digital Health Research Repositories: Cross-sectional International Survey
Source: PubMed Central journal article supplement (PMC8590194; doi:10.2196/31294), 2021-10-29
Supplement: jmir_v23i10e31294_app4.pdf [file jmir_v23i10e31294_app4.pdf]

| Willingness to share questionnaire and biospecimen data | All participants, n (%) | Participants in Brazil, n (%) | Participants in Denmark, n (%) |
|---------------------------------------------------------|-------------------------|-------------------------------|--------------------------------|
| <b>Sleep patterns</b>                                   |                         |                               |                                |
| Uncomfortable or very uncomfortable                     | 83 (5.18)               | 38 (3.73)                     | 45 (7.71)                      |
| Comfortable or very comfortable                         | 1351 (84.43)            | 873 (85.84)                   | 478 (81.98)                    |
| Neither uncomfortable nor comfortable                   | 164 (10.25)             | 106 (10.42)                   | 58 (9.94)                      |
| Prefer not to say                                       | 2 (0.12)                | 0 (0)                         | 2 (0.34)                       |
| <b>Food consumption</b>                                 |                         |                               |                                |
| Uncomfortable or very uncomfortable                     | 82 (5.12)               | 40 (3.93)                     | 42 (7.2)                       |
| Comfortable or very comfortable                         | 1354 (84.62)            | 865 (85.05)                   | 489 (83.87)                    |
| Neither uncomfortable nor comfortable                   | 161 (10.06)             | 111 (10.91)                   | 50 (8.57)                      |
| Prefer not to say                                       | 3 (0.18)                | 1 (0.09)                      | 2 (0.34)                       |
| <b>Alcohol consumption</b>                              |                         |                               |                                |
| Uncomfortable or very uncomfortable                     | 105 (6.56)              | 36 (3.53)                     | 69 (11.83)                     |
| Comfortable or very comfortable                         | 1274 (79.62)            | 817 (80.33)                   | 457 (78.38)                    |
| Neither uncomfortable nor comfortable                   | 221 (13.81)             | 164 (16.12)                   | 57 (9.77)                      |
| Prefer not to say                                       | 0 (0)                   | 0 (0)                         | 0 (0)                          |
| <b>Clinical diagnosis (physical)</b>                    |                         |                               |                                |
| Uncomfortable or very uncomfortable                     | 133 (8.31)              | 54 (5.3)                      | 79 (13.55)                     |
| Comfortable or very comfortable                         | 1238 (77.37)            | 800 (78.66)                   | 438 (75.12)                    |
| Neither uncomfortable nor comfortable                   | 229 (14.31)             | 163 (16.02)                   | 66 (11.32)                     |

| Willingness to share questionnaire and biospecimen data | All participants, n (%) | Participants in Brazil, n (%) | Participants in Denmark, n (%) |
|---------------------------------------------------------|-------------------------|-------------------------------|--------------------------------|
| Prefer not to say                                       | 0 (0)                   | 0 (0)                         | 0 (0)                          |
| <b>Family health</b>                                    |                         |                               |                                |
| Uncomfortable or very uncomfortable                     | 228 (14.25)             | 105 (10.32)                   | 123 (21.09)                    |
| Comfortable or very comfortable                         | 1070 (66.87)            | 710 (69.81)                   | 360 (61.74)                    |
| Neither uncomfortable nor comfortable                   | 302 (18.87)             | 202 (19.86)                   | 100 (17.15)                    |
| Prefer not to say                                       | 0 (0)                   | 0 (0)                         | 0 (0)                          |
| <b>Clinical diagnosis (mental)</b>                      |                         |                               |                                |
| Uncomfortable or very uncomfortable                     | 282 (17.62)             | 132 (12.97)                   | 150 (25.72)                    |
| Comfortable or very comfortable                         | 1060 (66.25)            | 702 (69.02)                   | 358 (61.4)                     |
| Neither uncomfortable nor comfortable                   | 258 (16.12)             | 183 (17.99)                   | 75 (12.86)                     |
| Prefer not to say                                       | 0 (0)                   | 0 (0)                         | 0 (0)                          |
| <b>Blood samples</b>                                    |                         |                               |                                |
| Uncomfortable or very uncomfortable                     | 321 (20.06)             | 211 (20.74)                   | 110 (18.86)                    |
| Comfortable or very comfortable                         | 1029 (64.31)            | 612 (60.17)                   | 417 (71.52)                    |
| Neither uncomfortable nor comfortable                   | 249 (15.56)             | 194 (19.07)                   | 55 (9.43)                      |
| Prefer not to say                                       | 1 (0.06)                | 0 (0)                         | 1 (0.17)                       |
| <b>DNA samples</b>                                      |                         |                               |                                |
| Uncomfortable or very uncomfortable                     | 556 (34.75)             | 319 (31.36)                   | 237 (40.65)                    |
| Comfortable or very comfortable                         | 750 (46.87)             | 488 (47.98)                   | 262 (44.93)                    |
| Neither uncomfortable nor comfortable                   | 294 (18.37)             | 210 (20.64)                   | 84 (14.4)                      |

| Willingness to share questionnaire and biospecimen data | All participants, n (%) | Participants in Brazil, n (%) | Participants in Denmark, n (%) |
|---------------------------------------------------------|-------------------------|-------------------------------|--------------------------------|
| Prefer not to say                                       | 0 (0)                   | 0 (0)                         | 0 (0)                          |
