# Supplementary material for: Public Attitudes to Digital Health Research Repositories: Cross-sectional International Survey
Source: PubMed Central journal article supplement (PMC8590194; doi:10.2196/31294), 2021-10-29
Supplement: jmir_v23i10e31294_app5.pdf [file jmir_v23i10e31294_app5.pdf]

| Willingness to share mobile and wearable sensing data | All participants, n (%) | Participants in Brazil, n (%) | Participants in Denmark, n (%) |
|-------------------------------------------------------|-------------------------|-------------------------------|--------------------------------|
| <b>Physical activity levels (heart rate)</b>          |                         |                               |                                |
| Uncomfortable or very uncomfortable                   | 150 (9.37)              | 66 (6.48)                     | 84 (14.4)                      |
| Comfortable or very comfortable                       | 1215 (75.93)            | 786 (77.28)                   | 429 (73.58)                    |
| Neither uncomfortable nor comfortable                 | 233 (14.56)             | 165 (16.22)                   | 68 (11.66)                     |
| Prefer not to say                                     | 2 (0.12)                | 0 (0)                         | 2 (0.34)                       |
| <b>Stress/emotional levels (heart rate)</b>           |                         |                               |                                |
| Uncomfortable or very uncomfortable                   | 204 (12.75)             | 82 (8.06)                     | 122 (20.92)                    |
| Comfortable or very comfortable                       | 1114 (69.62)            | 735 (72.27)                   | 379 (65)                       |
| Neither uncomfortable nor comfortable                 | 278 (17.37)             | 199 (19.56)                   | 79 (13.55)                     |
| Prefer not to say                                     | 4 (0.25)                | 1 (0.09)                      | 3 (0.51)                       |
| <b>Distances travelled per day</b>                    |                         |                               |                                |
| Uncomfortable or very uncomfortable                   | 282 (17.62)             | 168 (16.51)                   | 114 (19.55)                    |
| Comfortable or very comfortable                       | 1072 (67)               | 678 (66.66)                   | 394 (67.58)                    |
| Neither uncomfortable nor comfortable                 | 243 (15.18)             | 171 (16.81)                   | 72 (12.34)                     |
| Prefer not to say                                     | 3 (0.18)                | 0 (0)                         | 3 (0.51)                       |
| <b>Screen time</b>                                    |                         |                               |                                |
| Uncomfortable or very uncomfortable                   | 315 (19.68)             | 189 (18.58)                   | 126 (21.61)                    |
| Comfortable or very comfortable                       | 1022 (63.87)            | 644 (63.62)                   | 378 (64.83)                    |
| Neither uncomfortable nor comfortable                 | 261 (16.31)             | 184 (18.09)                   | 77 (13.2)                      |

| Willingness to share mobile and wearable sensing data |                                       | All participants, n (%) | Participants in Brazil, n (%) | Participants in Denmark, n (%) |
|-------------------------------------------------------|---------------------------------------|-------------------------|-------------------------------|--------------------------------|
|                                                       | Prefer not to say                     | 2 (0.12)                | 0 (0)                         | 2 (0.34)                       |
| <b>Frequency of social communication (calls/text)</b> |                                       |                         |                               |                                |
|                                                       | Uncomfortable or very uncomfortable   | 706 (44.12)             | 479 (47.09)                   | 227 (38.96)                    |
|                                                       | Comfortable or very comfortable       | 636 (39.75)             | 353 (34.7)                    | 283 (48.54)                    |
|                                                       | Neither uncomfortable nor comfortable | 254 (15.87)             | 185 (18.19)                   | 69 (11.83)                     |
|                                                       | Prefer not to say                     | 4 (0.25)                | 0 (0)                         | 4 (0.68)                       |
| <b>Apps used</b>                                      |                                       |                         |                               |                                |
|                                                       | Uncomfortable or very uncomfortable   | 775 (48.43)             | 534 (52.5)                    | 241 (41.33)                    |
|                                                       | Comfortable or very comfortable       | 555 (34.68)             | 312 (30.67)                   | 243 (41.68)                    |
|                                                       | Neither uncomfortable nor comfortable | 262 (16.37)             | 167 (16.42)                   | 95 (16.29)                     |
|                                                       | Prefer not to say                     | 8 (0.5)                 | 4 (0.39)                      | 4 (0.68)                       |
| <b>Places visited every day</b>                       |                                       |                         |                               |                                |
|                                                       | Uncomfortable or very uncomfortable   | 864 (54)                | 534 (52.5)                    | 330 (56.6)                     |
|                                                       | Comfortable or very comfortable       | 503 (31.43)             | 330 (32.44)                   | 176 (30.18)                    |
|                                                       | Neither uncomfortable nor comfortable | 227 (14.18)             | 153 (15.04)                   | 74 (8.06)                      |
|                                                       | Prefer not to say                     | 3 (0.18)                | 0 (0)                         | 3 (0.51)                       |
| <b>Content of social communication (calls/text)</b>   |                                       |                         |                               |                                |
|                                                       | Uncomfortable or very uncomfortable   | 1206 (75.37)            | 794 (78.07)                   | 412 (70.66)                    |
|                                                       | Comfortable or very comfortable       | 263 (16.43)             | 141 (13.86)                   | 122 (20.92)                    |
|                                                       | Neither uncomfortable nor comfortable | 127 (7.93)              | 80 (7.86)                     | 47 (8.06)                      |

| Willingness to share mobile and wearable sensing data | All participants, n (%) | Participants in Brazil, n (%) | Participants in Denmark, n (%) |
|-------------------------------------------------------|-------------------------|-------------------------------|--------------------------------|
| Prefer not to say                                     | 4 (0.25)                | 2 (0.19)                      | 2 (0.34)                       |
