# Supplementary material for: Public Attitudes to Digital Health Research Repositories: Cross-sectional International Survey
Source: PubMed Central journal article supplement (PMC8590194; doi:10.2196/31294), 2021-10-29
Supplement: jmir_v23i10e31294_app6.pdf [file jmir_v23i10e31294_app6.pdf]

| Desirability of access control options                      | All participants, n (%) | Participants in Brazil, n (%) | Participants in Denmark, n (%) |
|-------------------------------------------------------------|-------------------------|-------------------------------|--------------------------------|
| <b>To receive information about who is using my data</b>    |                         |                               |                                |
| Undesirable or very undesirable                             | 99 (6.18)               | 28 (2.75)                     | 71 (12.17)                     |
| Desirable or very desirable                                 | 1334 (83.37)            | 939 (92.33)                   | 395 (67.75)                    |
| Neither undesirable nor desirable                           | 160 (10)                | 10 (0.98)                     | 110 (18.86)                    |
| Prefer not to say                                           | 7 (0.43)                | 0 (0)                         | 7 (1.20)                       |
| <b>To decide who can have access to which parts my data</b> |                         |                               |                                |
| Undesirable or very undesirable                             | 100 (6.25)              | 44 (4.32)                     | 56 (9.6)                       |
| Desirable or very desirable                                 | 1181 (73.81)            | 785 (73.72)                   | 396 (67.92)                    |
| Neither undesirable nor desirable                           | 313 (19.56)             | 188 (18.48)                   | 125 (21.44)                    |
| Prefer not to say                                           | 6 (0.37)                | 0 (0)                         | 6 (1.02)                       |
| <b>That public or academic institutions can get access</b>  |                         |                               |                                |
| Undesirable or very undesirable                             | 317 (19.81)             | 263 (25.86)                   | 54 (9.26)                      |
| Desirable or very desirable                                 | 783 (48.93)             | 367 (36.08)                   | 416 (71.35)                    |
| Neither undesirable nor desirable                           | 495 (30.93)             | 386 (37.95)                   | 109 (18.69)                    |
| Prefer not to say                                           | 5 (0.31)                | 1 (0.09)                      | 4 (0.68)                       |
| <b>To never be contacted after I share my data</b>          |                         |                               |                                |
| Undesirable or very undesirable                             | 600 (37.5)              | 455 (44.73)                   | 145 (24.87)                    |
| Desirable or very desirable                                 | 408 (25.5)              | 167 (16.42)                   | 241 (41.33)                    |
| Neither undesirable nor desirable                           | 587 (36.68)             | 395 (38.83)                   | 192 (32.93)                    |
| Prefer not to say                                           | 5 (0.31)                | 0 (0)                         | 5 (0.85)                       |

| Desirability of access control options                             | All participants, n (%) | Participants in Brazil, n (%) | Participants in Denmark, n (%) |
|--------------------------------------------------------------------|-------------------------|-------------------------------|--------------------------------|
| <b>To have the repository managers deciding who can get access</b> |                         |                               |                                |
| Undesirable or very undesirable                                    | 794 (49.62)             | 589 (57.91)                   | 205 (35.16)                    |
| Desirable or very desirable                                        | 378 (23.62)             | 169 (16.61)                   | 209 (35.84)                    |
| Neither undesirable nor desirable                                  | 423 (26.43)             | 259 (25.46)                   | 164 (28.13)                    |
| Prefer not to say                                                  | 5 (0.31)                | 0 (0)                         | 5 (0.85)                       |
| <b>That private labs and companies can get access</b>              |                         |                               |                                |
| Undesirable or very undesirable                                    | 915 (57.18)             | 659 (64.79)                   | 256 (43.91)                    |
| Desirable or very desirable                                        | 215 (13.43)             | 78 (7.66)                     | 137 (23.49)                    |
| Neither undesirable nor desirable                                  | 465 (29.06)             | 280 (27.53)                   | 185 (31.73)                    |
| Prefer not to say                                                  | 5 (0.31)                | 0 (0)                         | 5 (0.85)                       |
